# Supplementary material for: The Physiological and Pathological Role of Acyl-CoA Oxidation
Source: MDPI journal article supplement (doi:10.3390/ijms241914857), 2023-10-03
Supplement: s1 [file s1]

# Physiological and Pathological Role of Acyl-CoA Oxidation

Sylwia Szrok-Jurga <sup>1,\*</sup>, Aleksandra Czumaj <sup>2,\*</sup>, Jacek Turyn <sup>1</sup>, Areta Hebanowska <sup>1</sup>, Julian Swierczynski <sup>3</sup>, Tomasz Sledzinski <sup>2</sup>, Ewa Stelmanska <sup>1</sup>

**Supplementary Table S1.** Sequence variations in fatty acid oxidation genes with clinical significance. Based on: MCID – MalaCards Human Disease Database, OMIM – Online Mendelian Inheritance in Man database, ORPHA – Orphanet database, ACADM – medium-chain acyl-CoA dehydrogenase, ACADS – short-chain acyl-CoA dehydrogenase, ACOX1 – peroxisomes acyl-CoA oxidase 1, ACSL – long-chain fatty acid acyl-CoA synthetase, ACSS – short-chain fatty acyl-CoA synthetases, CPT – carnitine palmitoyltransferase, ECHS1 – short-chain enoyl-CoA hydratase, EHHADH – enoyl-CoA hydratase and 3-hydroxyacyl CoA dehydrogenase, HADH – 3-hydroxyacyl-CoA dehydrogenase.

| Gene         | Clinical condition                                    | Variations                                  | Inheritance         | Prevalence                                 | Severity                                                                                                   | Ref.                                        |
|--------------|-------------------------------------------------------|---------------------------------------------|---------------------|--------------------------------------------|------------------------------------------------------------------------------------------------------------|---------------------------------------------|
| <i>ABCD1</i> | X linked adrenoleukodystrophy                         | Single base mutation, deletion, duplication | X-linked recessive  | 1:17 000                                   | Severe morbidity and mortality in most affected subjects                                                   | MCID: ADR007, OMIM: #300100, ORPHA: 43      |
| <i>ACOX1</i> | Peroxisomal acyl-CoA oxidase deficiency (pseudo-NALD) | Single base mutation, deletion              | Autosomal recessive | <1/1 000 000                               | Most children do not survive past early childhood                                                          | MCID: PRX028, OMIM: #264470                 |
| <i>ACSL4</i> | X-linked non-syndromic intellectual disability        | Single base mutation                        | X-linked recessive  | Reported in less than 5 families worldwide | From mild to severe mental retardation                                                                     | MCID: NNS032, OMIM: #300387,                |
| <i>ACSS2</i> | Orofacial Cleft 1                                     | Single base mutation                        | Autosomal dominant  | Prevalence not determined                  | Wide phenotypic spectrum                                                                                   | MCID: ORF048, OMIM: #119530                 |
| <i>CPT1A</i> | Carnitine palmitoyl-transferase 1 deficiency          | Single base mutation, deletion, duplication | Autosomal recessive | <1/1 000 000                               | Good prognosis with treatment (a low-fat diet, medium-chain TAG supplementation, and avoidance of fasting) | ORPHA: 156, OMIM: #255120, MCID: CRN295     |
| <i>CPT1C</i> | Spastic paraplegia 73                                 | Single base mutation, deletion              | Autosomal dominant  | Reported in less than 5 families worldwide | Onset and clinical course slowly progressive                                                               | ORPHA: 4444099, OMIM: #616282, MCID: SPS160 |
| <i>CPT2</i>  | Carnitine palmitoyl-transferase 2 deficiency          | Single base mutation, deletion, duplication | Autosomal recessive | <1/1 000 000                               | Three primary clinical forms: a) neonatal – almost always lethal, b)                                       | ORPHA: 157, OMIM: #608836, #255110,         |

|        |                                                            |                                                               |                                                  |                                        |                                                                                                       |                                             |
|--------|------------------------------------------------------------|---------------------------------------------------------------|--------------------------------------------------|----------------------------------------|-------------------------------------------------------------------------------------------------------|---------------------------------------------|
|        |                                                            |                                                               |                                                  |                                        | infantile – may lead to sudden death, c)<br>myopathic – good prognosis                                | #600649, MCID:<br>CRN296, CRN294,<br>CRN302 |
| ACADM  | Medium-chain acyl-CoA dehydrogenase deficiency             | Single base mutation, deletion, indel, duplication, insertion | Autosomal recessive                              | 1/4 000 (Europe), 1/15 000 (Worldwide) | Potentially fatal, normal life expectancy with early diagnosis                                        | ORPHA:42<br>OMIM: #231680<br>MCID: MDM001   |
|        | Reye syndrome                                              | Single base mutation                                          | Unknown                                          | <1/1 000 000 (Worldwide)               | ~30% chance of death, ~30% of long-term disability                                                    | [1,2]                                       |
| ACADS  | Short-chain acyl-CoA dehydrogenase deficiency              | Single base mutation, deletion, indel, duplication            | Autosomal recessive                              | 1/35 000 to 1/50 000                   | Highly variable phenotype, ranging from asymptomatic to severe                                        | OMIM: #201470 MCID: ACY005                  |
| ACADVL | Very long-chain acyl-CoA dehydrogenase deficiency          | Single base mutation, deletion, indel, duplication, insertion | Autosomal recessive                              | 1/30 000 to 1/120 000                  | Three main clinical forms: a) severe, with early death; b) milder, childhood form; c) mild adult form | OMIM: #201475<br>MCID: ACY010               |
| ECHS1  | Mitochondrial short-chain enoyl-CoA hydratase 1 deficiency | Single base mutation, deletion, duplication                   | Autosomal recessive                              | Prevalence not determined              | High mortality rate and poor prognosis                                                                | OMIM: #616277 MCID: MTC108                  |
|        | Leigh syndrome                                             | Single base mutation                                          | Autosomal recessive or mitochondrial inheritance | 1-9 / 100 000                          | Death at a few years of age, poor prognosis                                                           | ORPHA:506 OMIM: #256000<br>MCID: LGH007     |
| EHHADH | Fanconi renotubular syndrome type 3                        | Single base mutation                                          | Autosomal dominant                               | Prevalence not determined              | With treatment, normal physical and neurocognitive development is usually possible                    | OMIM: #615605, MCID: FNC049                 |
| HADH   | 3-hydroxyacyl-CoA dehydrogenase deficiency                 | Single base mutation, deletion                                | Autosomal recessive                              | Reported in 31 families worldwide      | Highly variable phenotype, sudden infant death may occur                                              | OMIM: #231530, MCID: 3HY005                 |

---

|                              |                                                        |                                             |                     |                                           |                                                                                                                                                      |                                           |
|------------------------------|--------------------------------------------------------|---------------------------------------------|---------------------|-------------------------------------------|------------------------------------------------------------------------------------------------------------------------------------------------------|-------------------------------------------|
|                              | Familial hyperinsulinemia hypoglycemia type 4          | Single base mutation, deletion              | Autosomal recessive | <1/1 000 000                              | Potentially fatal                                                                                                                                    | ORPHA: 71212, OMIM: #309975, MCID: HYP271 |
| <i>HADHA</i>                 | Long-chain 3-hydroxy acyl-CoA dehydrogenase deficiency | Single base mutation, deletion, duplication | Autosomal recessive | 1/250 000 (Worldwide), 1/120 000 (Poland) | Episodic illness                                                                                                                                     | ORPHA:5, OMIM: #609016, MCID: LNG073      |
| <i>HADHA</i><br><i>HADHB</i> | Mitochondrial trifunctional protein deficiency         | Single base mutation, duplication           | Autosomal recessive | 1-9/100 000 (Europe)                      | Three major clinical forms: a) neonatal – severe, lethal condition, b) infantile, c) childhood/adolescent – protracted, with myopathy and neuropathy | ORPHA: 746, OMIM: #609015, MCID: MTC027   |

**Supplementary Table S2** Traits associated with genetic variants of fatty acid oxidation enzymes. CAD – coronary artery disease, CKD – chronic kidney disease, FA – fatty acid, DHA – docosahexaenoic acid, HDL – high-density lipoprotein, LDL – low-density lipoprotein, MUFA – monounsaturated fatty acids, PUFA – polyunsaturated fatty acids, SHBG – sex hormone-binding globulin, TAG – triglyceride, VLDL – very-low-density lipoprotein.

| Enzyme                         | Gene  | SNP variant                                       | Associated trait                         | Nature of change                         | Tested population                       | Ref.   |
|--------------------------------|-------|---------------------------------------------------|------------------------------------------|------------------------------------------|-----------------------------------------|--------|
| Long-chain acyl-CoA synthetase | ACSL1 | rs4862423-T                                       | Fasting glucose                          | Increased level of glucose               | European                                | [3]    |
|                                |       | rs55691245-G,<br>rs72695645-G,<br>rs1996546-G     | Type 2 diabetes                          | Increased risk of diabetes type 2        | European,<br>African<br>American, Asian | [4,5]  |
|                                |       | rs735949-C                                        | Type 2 diabetes                          | Decreased risk of diabetes type 2        | European                                | [6]    |
|                                | ACSL3 | rs2461751-G                                       | Electrocardiographic conduction measures | Increased PR interval                    | Oceanian                                | [7]    |
|                                | ACSL4 | rs190431955-A                                     | Mean platelet volume                     | Decreased volume of platelet             | European                                | [8]    |
|                                | ACSL5 | rs58854276-A                                      | Amyotrophic lateral sclerosis            | Increased risk of disease                | European, East Asian                    | [9]    |
|                                |       | rs58854276-G                                      | HDL cholesterol level                    | Increased level of blood HDL cholesterol | East Asian                              | [10]   |
|                                |       | rs3736946-G                                       | TAG level                                | Decreased level of blood TAG             | European,<br>African, South Asian       | [11]   |
|                                |       | rs146605626-A,<br>rs561263417-T,<br>rs146605626-A | Mean platelet volume                     | Increased volume of platelet             | European                                | [8,12] |
|                                |       | rs2419626-A,<br>rs79671623-A                      | Platelet count                           | Decreased number of platelet             | European                                | [8,13] |

|                                  |        |                               |                                                       |                                                                            |                                                                   |         |
|----------------------------------|--------|-------------------------------|-------------------------------------------------------|----------------------------------------------------------------------------|-------------------------------------------------------------------|---------|
|                                  | ACSL6  | rs253942-T                    | TAG level                                             | Increased level of blood TAG                                               | European                                                          | [14]    |
| Medium-chain acyl-CoA synthetase | ACSM2A | rs757002-A                    | Estimated glomerular filtration rate                  | Decreased rate of glomerular filtration                                    | East Asian<br>Latin American,<br>African<br>American,<br>European | [15]    |
|                                  |        | rs10163426-T                  | Indoleacetoylecarnitine, indoleacetylglutamine levels | Increased level of blood indoleacetoylecarnitine and indoleacetylglutamine | European                                                          | [16]    |
|                                  |        | rs6497490-G                   | Indolepropionate level                                | Increased level of blood indolepropionate                                  | European                                                          | [17]    |
|                                  |        | rs4783532-G,<br>rs1394678-T   | Indolepropionate level                                | Decreased level of blood indolepropionate                                  | European                                                          | [17,18] |
|                                  | ACSM2B | rs35623745-G                  | Creatinine level                                      | Decreased level of blood creatinine                                        | European,<br>African, South<br>Asian                              | [11]    |
|                                  |        | rs35243287-G                  | Serum uric acid level                                 | Decreased level of serum uric acid                                         | East Asian                                                        | [19]    |
|                                  |        | rs7499271-T                   | Serum picolinate level                                | Decreased level of serum picolinate                                        | Latin American                                                    | [20]    |
|                                  |        | rs62035059-T                  | Serum picolinate level                                | Increased level of serum picolinate                                        | Latin American                                                    | [20]    |
|                                  |        | rs142593364-T                 | Serum $\beta$ -hydroxyisovalerate level               | Increased level of serum $\beta$ -hydroxyisovalerate                       | Latin American                                                    | [20]    |
|                                  |        | rs7499271-A,<br>rs977186117-A | Serum phenylacetate level                             | Increased level of serum phenylacetate                                     | European,<br>African<br>American                                  | [16,21] |

|  |       |               |                                                                                                                                                          |                                                                                                                                                                                                |                                               |      |
|--|-------|---------------|----------------------------------------------------------------------------------------------------------------------------------------------------------|------------------------------------------------------------------------------------------------------------------------------------------------------------------------------------------------|-----------------------------------------------|------|
|  |       | rs11645661-A  | 3-indolepropionic acid level in CAD                                                                                                                      | Decreased level in plasma of patients with CAD                                                                                                                                                 | East Asian                                    | [22] |
|  |       | rs73530508-A  | L-tryptophan to 3-indolepropionic acid, L-histidine to 3-indolepropionic acid ratio in patients with CAD                                                 | Decreased ratio of: L-tryptophan to 3-indolepropionic acid, and L-histidine to 3-indolepropionic acid in plasma of patients with CAD                                                           | East Asian                                    | [22] |
|  |       | rs73530508-A  | 3-Indolepropionic acid to L-lysine, 3-indolepropionic acid to uridine, 3-indolepropionic acid to adenine, 3-indolepropionic acid to adenine ratio in CAD | Increased ratio of: 3-Indolepropionic acid to L-lysine, 3-indolepropionic acid to uridine, 3-indolepropionic acid to adenine, 3-indolepropionic acid to adenine in plasma of patients with CAD | East Asian                                    | [22] |
|  | ACSM3 | rs55792109-T  | Creatinine, urate levels                                                                                                                                 | Increased levels of blood creatinine and urate                                                                                                                                                 | European, African, South Asian                | [11] |
|  |       | rs55792109-T  | Estimated glomerular filtration rate                                                                                                                     | Decreased glomerular filtration rate                                                                                                                                                           | European, African, South Asian                | [11] |
|  |       | rs978161-T    | 4-hydroxy-phenylacetylglutamine level                                                                                                                    | Increased level of blood 4-hydroxy-phenylacetylglutamine                                                                                                                                       | European                                      | [16] |
|  | ACSM5 | rs142481473-A | Estimated glomerular filtration rate                                                                                                                     | Increased glomerular filtration rate                                                                                                                                                           | European, East Asian, African, Latin American | [23] |

|                                    |       |                               |                                                               |                                                                              |                                                                           |         |
|------------------------------------|-------|-------------------------------|---------------------------------------------------------------|------------------------------------------------------------------------------|---------------------------------------------------------------------------|---------|
|                                    |       |                               |                                                               |                                                                              | African<br>American,<br>Central Asian,<br>South Asian,<br>Native American |         |
|                                    |       | rs34927101-T,<br>rs11647589-A | 3-phenylpropionate level                                      | Increased level of<br>plasma/serum 3-<br>phenylpropionate                    | European                                                                  | [17,18] |
|                                    |       | rs9929808-T,<br>rs6497488-T   | 3-indolepropionic acid level in<br>CAD                        | Decreased level of plasma 3-<br>indolepropionic acid in<br>patients with CAD | East Asian                                                                | [22]    |
|                                    | ACSM6 | rs685607-A                    | Urinary dimethylmalonic acid<br>level in CKD                  | Increased level of urinary<br>dimethylmalonic acid in<br>patients with CKD   | European                                                                  | [24]    |
|                                    |       | rs147096448-A                 | 3-hydroxy-2-ethylpropionate<br>level                          | Decreased level of plasma 3-<br>hydroxy-2-ethylpropionate                    | European                                                                  | [17]    |
| Short-chain acyl-CoA<br>synthetase | ACSS1 | rs4815364-A                   | Alcohol consumption, bitter<br>alcoholic beverage consumption | Increased number of drinks<br>per week, Increased<br>consumption             | European                                                                  | [25,26] |
|                                    |       | rs77671253-G                  | Blood protein level                                           | Decreased level of blood<br>protein                                          | European                                                                  | [27]    |
|                                    |       | rs910527-C,<br>rs76659077-C   | Decreased level of cystatin-F                                 | Decreased level of blood<br>cystatin-F                                       | Middle Eastern                                                            | [28]    |
|                                    | ACSS2 | rs67719508-C                  | Appendicular lean mass                                        | Increased appendicular lean<br>mass                                          | European                                                                  | [29]    |
|                                    |       | rs8123210-G                   | Acetate level                                                 | Decreased level of blood<br>acetate                                          | European                                                                  | [30]    |
|                                    |       | rs6088638-C                   | Hip circumference                                             | Increased hip circumference                                                  | European                                                                  | [31]    |

|                                  |       |                                                        |                                                                                                                                                         |                                                                                                                                                         |                                               |            |
|----------------------------------|-------|--------------------------------------------------------|---------------------------------------------------------------------------------------------------------------------------------------------------------|---------------------------------------------------------------------------------------------------------------------------------------------------------|-----------------------------------------------|------------|
|                                  | ACSS3 | rs11114664-T                                           | Serum $\gamma$ -glutamyl transferase                                                                                                                    | Decreased level of serum $\gamma$ -glutamyl transferase                                                                                                 | European, East Asian                          | [19]       |
|                                  |       | rs12296937-G                                           | Age-related cataracts                                                                                                                                   | Decreased age at onset                                                                                                                                  | European, African unspecified,                | [32]       |
|                                  |       | rs10862220-T                                           | Walking pace                                                                                                                                            | Decreased walking pace                                                                                                                                  | European                                      | [33]       |
|                                  |       | rs11114787-T                                           | Alcohol consumption                                                                                                                                     | Increased alcohol consumption                                                                                                                           | European                                      | [34]       |
|                                  |       | rs10506274-T, rs12826108-A, rs11835638-C, rs61934664-A | Alcohol consumption                                                                                                                                     | Decreased alcohol consumption                                                                                                                           | European, East Asian, Latin American, African | [25,35,36] |
|                                  |       | rs7138951-G                                            | Plasma amyloid beta peptide concentrations (ABx-42)                                                                                                     | Increased concentration of plasma amyloid beta peptide (ABx-42)                                                                                         | European                                      | [37]       |
| Carnitine palmitoyltransferase 1 | CPT1A | rs2278907-A                                            | Bone density                                                                                                                                            | Increased bone density                                                                                                                                  | European                                      | [38]       |
|                                  |       | rs11228377-T, rs597539-G                               | TAG level                                                                                                                                               | Increased blood TAG level                                                                                                                               | European, East Asian                          | [19,39]    |
|                                  |       | rs78863347-T                                           | Urate concentration                                                                                                                                     | Increased serum urate concentration                                                                                                                     | East Asian                                    | [40]       |
|                                  |       | rs2229738-T                                            | Serum alkaline phosphatase level                                                                                                                        | Increased serum alkaline phosphatase level                                                                                                              | European, East Asian                          | [19]       |
|                                  |       | rs2229738-C                                            | Free cholesterol to total lipids ratio in LDL cholesterol, cholesterol to total lipids in VLDL, PUFA to MUFA ratio, PUFA to total FA ratio, $\omega$ -3 | Increased ratio of free cholesterol to total lipids ratio in LDL cholesterol, cholesterol to total lipids in VLDL, PUFA to MUFA ratio, PUFA to total FA | European                                      | [30]       |



|                                     |                               |                                              |                                                      |                                                                                 |                                |         |
|-------------------------------------|-------------------------------|----------------------------------------------|------------------------------------------------------|---------------------------------------------------------------------------------|--------------------------------|---------|
|                                     |                               |                                              | PUFA to total FA ratio, DHA to total FA ratio        | ratio, $\omega$ -3 PUFA to total FA ratio, DHA to total FA ratio                |                                |         |
|                                     |                               |                                              | MUFA to total FA, $\omega$ -6 PUFA to n-3 PUFA ratio | Decreased ratio of blood MUFA to total FA, $\omega$ -6 PUFA to $\omega$ -3 PUFA | European                       | [30]    |
|                                     |                               |                                              | n-3 PUFA level                                       | Increased level of blood n-3 PUFA                                               | European                       | [30,41] |
|                                     |                               | rs11228374-A,<br>rs2003892-A                 | HDL cholesterol level                                | Decreased blood HDL cholesterol level                                           | European, East Asian           | [14,19] |
|                                     |                               | rs11605837-G                                 | HDL cholesterol level, ApoA1 level                   | Increased blood HDL cholesterol and ApoA1 level.                                | European                       | [39]    |
|                                     | <i>CPT1C</i>                  | rs147472287-T                                | Lung function                                        | Decreased forced expiratory volume (FEV) to forced vital capacity (FCV) ratio   | African                        | [42]    |
|                                     |                               | rs45617640-T                                 | Serum albumin level, serum total protein level       | Decreased level of serum albumin and seru total protein                         | European, African, South Asian | [11]    |
| Carnitine palmitoyltransferase 2    | <i>CPT2</i>                   | rs77466051-A,<br>rs2229291-T,<br>rs1799822-A | Glutaryl carnitine level                             | Increased level of blood glutaryl carnitine                                     | East Asian, Latin American     | [20,43] |
|                                     |                               | rs1799822-G                                  | Glutaryl carnitine level                             | Decreased level of blood glutaryl carnitine                                     | European                       | [16]    |
|                                     |                               | rs11581518-A                                 | Adipoyl carnitine level                              | Decreased level of blood adipoyl carnitine                                      | Latin American                 | [20]    |
| Medium-chain acyl-CoA dehydrogenase | <i>ACADM</i> ( <i>ACAD1</i> ) | rs61799988-A                                 | hexanoyl-carnitine, octanoyl-carnitine levels        | Decreased level of blood hexanoyl-carnitine, octanoyl-carnitine                 | European                       | [44]    |

|                                    |                  |                             |                                                                    |                                                                                                         |                |         |
|------------------------------------|------------------|-----------------------------|--------------------------------------------------------------------|---------------------------------------------------------------------------------------------------------|----------------|---------|
|                                    |                  | rs12126607-A<br>rs4646961-A | Glycine level                                                      | Increased level of blood glycine                                                                        | European       | [45–47] |
|                                    |                  | rs1251075-G<br>rs11161430-T | N-octanoylglutamine, hexanoylglycine, and isocaproylglycine levels | Decreased urinary levels of N-octanoylglutamine, hexanoylglycine, and isocaproylglycine in CKD patients | European       | [24]    |
| Short-chain acyl-CoA dehydrogenase | ACADS<br>(ACAD3) | rs9204-A                    | 2-methylsuccinic acid level                                        | Increased level of 2-methylsuccinic acid in plasma of CAD patients                                      | East Asian     | [22]    |
|                                    |                  | rs59063082-T                | Acylcarnitine level                                                | Decreased level of blood acylcarnitine                                                                  | East Asian     | [43]    |
|                                    |                  | rs575437-T                  | Ethylmalonate level                                                | Decreased serum level of ethylmalonate                                                                  | Latin American | [20]    |
|                                    |                  | rs3916-C                    | Butyrylcarnitine level                                             | Increased level of blood butyrylcarnitine                                                               | European       | [46]    |
|                                    |                  |                             | Methylsuccinate level                                              | Increased urinary level of methylsuccinate in CKD patients                                              | European       | [24]    |
|                                    |                  | rs34491494-C                | Butyrylcarnitine level                                             | Decreased serum level of butyrylcarnitine                                                               | Latin American | [20]    |
|                                    |                  | rs2014355-C                 | Butyrylcarnitine, isobutyrylcarnitine levels                       | Increased serum levels of butyrylcarnitine and isobutyrylcarnitine in CKD patients                      | European       | [48]    |
|                                    |                  | rs1799958-A                 | Carnitine, butyrylcarnitine, and isobutyrylcarnitine levels        | Decreased serum levels of carnitine, butyrylcarnitine,                                                  | European       | [48]    |

|                                        |                              |              |                                                                                      |                                                                                                                           |                                |         |
|----------------------------------------|------------------------------|--------------|--------------------------------------------------------------------------------------|---------------------------------------------------------------------------------------------------------------------------|--------------------------------|---------|
|                                        |                              |              |                                                                                      | and isobutyrylcarnitine in CKD patients                                                                                   |                                |         |
|                                        |                              |              | 5-hydroxyhexanoate, ethylmalonate, N-formylmethionine, and triacetate lactone levels | Increased urinary levels of 5-hydroxyhexanoate, ethylmalonate, N-formylmethionine, and triacetate lactone in CKD patients | European                       | [24]    |
|                                        |                              | rs1800556-C  | Ethylmalonate level                                                                  | Decreased serum level of ethylmalonate                                                                                    | Latin American                 | [20]    |
| Long-chain acyl-CoA dehydrogenase      | ACADL (LCAD, ACAD4)          | rs2286963-T  | Nonaylcarnitine level                                                                | Increased serum level of blood nonaylcarnitine                                                                            | European                       | [49]    |
|                                        |                              | rs3764913-C  | Nonaylcarnitine level in CKD                                                         | Increased serum level of nonaylcarnitine level in CKD patients                                                            | European, African American     | [44,48] |
|                                        |                              | rs2286963-T  | Decadienylcarnitine level                                                            | Increased serum level of decadienylcarnitine                                                                              | European                       | [49]    |
|                                        |                              | rs2286963-G  | Glycine conjugate of C <sub>9</sub> H <sub>16</sub> O <sub>2</sub> level             | Increased urinary level of glycine conjugate of C <sub>9</sub> H <sub>16</sub> O <sub>2</sub>                             | European                       | [24]    |
| Very long-chain acyl-CoA dehydrogenase | ACADVL (VLCAD, LCACD, ACAD6) | rs77680021-A | Apolipoprotein B levels                                                              | Decreased blood level of apolipoprotein B                                                                                 | European, African, South Asian | [11]    |
|                                        |                              |              | Alkaline phosphatase level                                                           | Increased serum level of alkaline phosphatase                                                                             | European, African, South Asian | [11]    |

|                                         |        |               |                           |                                                                |                                             |      |
|-----------------------------------------|--------|---------------|---------------------------|----------------------------------------------------------------|---------------------------------------------|------|
|                                         |        |               | Total cholesterol level   | Decreased level of blood total cholesterol                     | European, African, South Asian              | [11] |
|                                         |        |               | LDL level                 | Decreased level of blood LDL cholesterol                       | European, African, South Asian              | [11] |
|                                         |        |               | Testosterone level        | Increased serum level of testosterone (patients of both sexes) | European, African, South Asian              | [11] |
|                                         |        |               | SHBG level                | Increased serum level of SHBG (patients of both sexes)         | European, African, South Asian              | [11] |
| Acyl-CoA dehydrogenase family member 8  | ACAD8  | rs113488591-C | Isobutyrylcarnitine level | Decreased serum level of isobutyrylcarnitine                   | Latin American                              | [20] |
|                                         |        | rs113488591-G | Butyrylcarnitine level    | Increased serum level of butyrylcarnitine                      | European                                    | [46] |
| Acyl-CoA dehydrogenase family member 9  | ACAD9  | rs184937941-T | Blood-cell ratios         | Increased lymphocyte-to-monocyte ratio                         | European                                    | [50] |
| Acyl-CoA dehydrogenase family member 10 | ACAD10 | rs847888-A    | Diastolic blood pressure  | Increased diastolic blood pressure                             | African American, Latin American, European, | [51] |
|                                         |        |               | White blood cell count    | Increased lymphocyte count                                     | Latin American                              | [52] |
|                                         |        | rs6490294-A   | Platelet count            | Decreased cells/L number                                       | African American                            | [53] |
|                                         |        | rs11066015-A  | Atrial fibrillation       | Decreased atrial flutter                                       | European, East Asian                        | [19] |

|                                   |              |               |                                               |                                              |                      |         |
|-----------------------------------|--------------|---------------|-----------------------------------------------|----------------------------------------------|----------------------|---------|
|                                   |              |               | Urea nitrogen                                 | Increased blood level of urea nitrogen       | European, East Asian | [19]    |
|                                   |              |               | Colon polyp                                   | Decreased risk of polyp of colon             | European, East Asian | [19]    |
|                                   |              |               | Fish consumption measurement                  | Decreased fish intake frequency              | East Asian           | [54]    |
|                                   |              |               | HDL cholesterol level                         | Decreased level of blood HDL cholesterol     | East Asian, European | [19]    |
|                                   |              |               | LDL cholesterol level                         | Increased level of blood LDL cholesterol     | East Asian, European | [19]    |
|                                   |              |               | Body height                                   | Decreased body height                        | East Asian           | [19]    |
|                                   |              |               | Mean corpuscular hemoglobin                   | Decreased mean corpuscular hemoglobin volume | East Asian, European | [19]    |
|                                   |              |               | Pulse pressure                                | Decreased pulse pressure                     | East Asian, European | [19]    |
|                                   |              |               | Uric acid                                     | Decreased blood uric acid level              | East Asian           | [55,56] |
|                                   |              | rs11066008-G  | Blood molybdenum                              | Increased blood molybdenum level             | East Asian           | [57]    |
| Enoyl-CoA hydratase 1             | <i>ECH1</i>  | rs11066008-A  | Red blood cell                                | Decreased red blood cell count               | East Asian           | [13]    |
|                                   |              | rs2229259-T   | ECH1 protein level                            | Increased blood level of ECH1 protein        | European             | [58]    |
|                                   |              | rs4802890-G   | ECH1 protein level                            | Decreased blood level of ECH1 protein        | European             | [27]    |
| Short-chain enoyl-CoA hydratase 1 | <i>ECHS1</i> | rs140410716-T | Response to aspirin and clopidogrel treatment | Major adverse cardiovascular events in       | East Asian           | [59]    |

---

|                                                         |               |               |                                                             |                                                                                        |                                |      |
|---------------------------------------------------------|---------------|---------------|-------------------------------------------------------------|----------------------------------------------------------------------------------------|--------------------------------|------|
|                                                         |               |               |                                                             | response to drugs in acute coronary syndrome                                           |                                |      |
|                                                         |               | rs79000481-C  | Acisoga level                                               | Increased serum level                                                                  | Latin American                 | [20] |
| Enoyl-CoA hydratase and 3-hydroxyacyl CoA dehydrogenase | <i>EHHADH</i> | rs11322724-T  | SHBG level                                                  | Increased level of blood SHBG (patients of both sexes)                                 | European, African, South Asian | [11] |
|                                                         |               | rs6786798-A   | Insomnia                                                    | Decreased risk                                                                         | European                       | [60] |
| Enoyl-CoA hydratase domain containing 2                 | <i>ECHDC2</i> | rs140559632-C | Total cholesterol, non-HDL cholesterol, and LDL cholesterol | Decreased levels of blood: total cholesterol, non-HDL cholesterol, and LDL cholesterol | European                       | [14] |

**Supplementary Table S3. List of abbreviations used in the paper**

| <b>Abbreviation</b> | <b>Meaning</b>                                          |
|---------------------|---------------------------------------------------------|
| βOX                 | β-oxidation                                             |
| ABC transporter     | ATP binding cassette transporter                        |
| AcAc                | Acetoacetate                                            |
| ACAD9               | Acyl-CoA dehydrogenase DH-9                             |
| ACBP                | Acyl-CoA-binding protein                                |
| ACC                 | Acetyl-CoA carboxylase                                  |
| ACS                 | Acyl-CoA synthetase                                     |
| ACSL                | Long-chain acyl-CoA synthetase                          |
| ACSM                | Medium-chain acyl-CoA synthetase                        |
| ACSS                | Short-chain acyl-CoA synthetase                         |
| ACOT                | Acyl-CoA diesterases                                    |
| ACOX                | Acyl-CoA oxidase                                        |
| ACSVL               | Very long-chain acyl-CoA synthetase                     |
| AD                  | Acyl-CoA dehydrogenase                                  |
| AR                  | Androgen receptor                                       |
| BAT                 | Brown adipose tissue                                    |
| BHB                 | D-β-hydroxybutyrate                                     |
| BDH                 | D-β-hydroxybutyrate dehydrogenase                       |
| CAC                 | Acylcarnitine translocase                               |
| CD36                | Fatty acid translocase (cluster of differentiation 36)  |
| CKD                 | Chronic kidney disease                                  |
| CPS                 | Carbamoyl phosphate synthetase                          |
| CPT                 | Carnitine palmitoyltransferase                          |
| CoA                 | Coenzyme Q                                              |
| CYP                 | Cytochrome P-450                                        |
| DBD                 | DNA-binding domain                                      |
| EC                  | Endothelial cell                                        |
| ECH                 | Enoyl-CoA-hydratase                                     |
| ECHS                | Short-chain enoyl-CoA hydratase                         |
| ECHS1D              | Short-chain enoyl-CoA hydratase 1 deficiency            |
| ECI                 | 3,2-trans-enoyl-CoA isomerase                           |
| EHHADH              | Enoyl-CoA hydratase and 3-hydroxyacyl CoA dehydrogenase |
| ER                  | Endoplasmic reticulum                                   |
| ESR                 | Estrogen receptor                                       |
| ETF                 | Electron-transferring flavoprotein                      |
| FABPc               | Cytosolic fatty acid-binding protein                    |
| FABPm               | Membrane fatty acid-binding protein                     |
| FA                  | Fatty acid                                              |
| FATP                | Fatty acid transporting protein                         |
| FAO                 | Fatty acid oxidation                                    |
| FAOD                | Fatty acid oxidation disorders                          |
| FFA                 | Free fatty acid                                         |
| GBM                 | Glioblastoma multiforme                                 |
| GLUT                | Glucose transporter                                     |
| GSH                 | Reduced glutathione                                     |
| HAD                 | Hydroxy-acyl-CoA dehydrogenase                          |
| HADHA               | Mitochondrial trifunctional protein, alpha subunit      |
| HADHB               | Mitochondrial trifunctional protein, beta subunit       |
| HCC                 | Hepatocellular carcinoma                                |
| HDL                 | High-density lipoprotein                                |
| HF                  | Heart failure                                           |
| HMGCL               | 3-hydroxy-3-methylglutaryl-CoA lyase                    |
| HMG-CoA             | 3-hydroxy-3-methylglutaryl-CoA                          |
| HMGCS               | 3-hydroxy-3-methylglutaryl-CoA synthase                 |
| IDH                 | Isocitrate dehydrogenase                                |

---

|               |                                                                    |
|---------------|--------------------------------------------------------------------|
| IPF           | Idiopathic pulmonary fibrosis                                      |
| LCAD          | Long-chain acyl-CoA dehydrogenase                                  |
| LCEH          | Long-chain enoyl-CoA hydratase                                     |
| LCHAD         | Long-chain hydroxy acyl-CoA dehydrogenase                          |
| LCHADD        | Long-chain hydroxy acyl-CoA dehydrogenase deficiency               |
| LCKAT         | Long-chain fatty acid $\beta$ -ketothiolase                        |
| LCFA          | Long-chain fatty acid                                              |
| LDL           | Low-density lipoprotein                                            |
| MCAD          | Medium-chain acyl-CoA dehydrogenase                                |
| MCD           | Malonyl-CoA decarboxylase                                          |
| MCFA          | Medium-chain fatty acid                                            |
| MCKAT         | Medium-chain ketoacyl-CoA thiolase                                 |
| ME            | Malic enzyme                                                       |
| MTP           | Mitochondrial trifunctional protein                                |
| MTPD          | Mitochondrial trifunctional protein deficiency                     |
| NAG           | N-acetylglutamate                                                  |
| NATs          | N-acetyl transferases                                              |
| OCTN          | Carnitine transporter present in heart, skeletal muscle and kidney |
| OXPHOS        | Oxidative phosphorylation                                          |
| PDC           | Pyruvate dehydrogenase complex                                     |
| PGC1 $\alpha$ | PPAR $\gamma$ coactivator 1 $\alpha$                               |
| PKC           | Protein kinase C                                                   |
| PPRE          | Peroxisome proliferator response element                           |
| PPAR          | Peroxisome proliferator-activated receptor                         |
| pseudo-NALD   | Pseudoneonatal adrenoleukodystrophy                                |
| PUFA          | Polyunsaturated fatty acid                                         |
| ROS           | Reactive oxygen species                                            |
| RXR           | Retinoid X receptor                                                |
| SCAD          | Short-chain acyl-CoA dehydrogenase                                 |
| SCADD         | Short-chain acyl-CoA dehydrogenase deficiency                      |
| SCOT          | Succinyl-CoA:3-oxoacid-CoA transferase                             |
| SCFA          | Short-chain fatty acid                                             |
| SCHAD         | Short-chain hydroxy acyl-CoA dehydrogenase                         |
| TAG           | Triacylglycerol                                                    |
| T2D           | Type 2 diabetes                                                    |
| TCA           | Tricarboxylic acid / Krebs cycle                                   |
| TGF           | Transforming growth factor                                         |
| TSPO          | Translocator protein                                               |
| VDAC          | Voltage-dependent anion channel                                    |
| VLCAD         | Very long-chain acyl-CoA dehydrogenase                             |
| VLDL          | Very-low-density lipoprotein                                       |
| WAT           | White adipose tissue                                               |
| X-ALD         | X linked adrenoleukodystrophy                                      |



---

## References

1. Pugliese, A.; Beltramo, T.; Torre, D. Reye's and Reye's-like syndromes. *Cell Biochem. Funct.* **2008**, *26*, 741–746, doi:10.1002/CBF.1465.
2. Schrör, K. Aspirin and Reye syndrome: A review of the evidence. *Pediatr. Drugs* **2007**, *9*, 195–204.
3. Chen, J.; Spracklen, C.N.; Marenne, G.; Varshney, A.; Corbin, L.J.; Luan, J.; Willems, S.M.; Wu, Y.; Zhang, X.; Horikoshi, M.; et al. The Trans-Ancestral Genomic Architecture of Glycemic Traits. *Nat. Genet.* **2021**, *53*, 840, doi:10.1038/S41588-021-00852-9.
4. Vujkovic, M.; Keaton, J.M.; Lynch, J.A.; Miller, D.R.; Zhou, J.; Tcheandjieu, C.; Huffman, J.E.; Assimes, T.L.; Lorenz, K.; Zhu, X.; et al. Discovery of 318 new risk loci for type 2 diabetes and related vascular outcomes among 1.4 million participants in a multi-ancestry meta-analysis. *Nat. Genet.* **2020**, *52*, 680–691, doi:10.1038/s41588-020-0637-y.
5. Mahajan, A.; Spracklen, C.N.; Zhang, W.; Ng, M.C.Y.; Petty, L.E.; Kitajima, H.; Yu, G.Z.; Rüeger, S.; Speidel, L.; Kim, Y.J.; et al. Multi-ancestry genetic study of type 2 diabetes highlights the power of diverse populations for discovery and translation. *Nat. Genet.* **2022**, *54*, 560–572, doi:10.1038/s41588-022-01058-3.
6. Xue, A.; Wu, Y.; Zhu, Z.; Zhang, F.; Kemper, K.E.; Zheng, Z.; Yengo, L.; Lloyd-Jones, L.R.; Sidorenko, J.; Wu, Y.; et al. Genome-wide association analyses identify 143 risk variants and putative regulatory mechanisms for type 2 diabetes. *Nat. Commun.* **2018**, *9*, doi:10.1038/s41467-018-04951-w.
7. Smith, J.G.; Lowe, J.K.; Kovvali, S.; Maller, J.B.; Salit, J.; Daly, M.J.; Stoffel, M.; Altshuler, D.M.; Friedman, J.M.; Breslow, J.L.; et al. Genome-wide association study of electrocardiographic conduction measures in an isolated founder population: Kosrae. *Hear. Rhythm* **2009**, *6*, 634–641, doi:10.1016/j.hrthm.2009.02.022.
8. Vuckovic, D.; Bao, E.L.; Akbari, P.; Lareau, C.A.; Mousas, A.; Jiang, T.; Chen, M.H.; Raffield, L.M.; Tardaguila, M.; Huffman, J.E.; et al. The Polygenic and Monogenic Basis of Blood Traits and Diseases. *Cell* **2020**, *182*, 1214–1231.e11, doi:10.1016/j.cell.2020.08.008.
9. van Rheenen, W.; van der Spek, R.A.A.; Bakker, M.K.; van Vugt, J.J.F.A.; Hop, P.J.; Zwamborn, R.A.J.; de Klein, N.; Westra, H.J.; Bakker, O.B.; Deelen, P.; et al. Common and rare variant association analyses in amyotrophic lateral sclerosis identify 15 risk loci with distinct genetic architectures and neuron-specific biology. *Nat. Genet.* **2021**, *53*, 1636–1648, doi:10.1038/s41588-021-00973-1.
10. Lee, S.B.; Choi, J.E.; Park, B.; Cha, M.Y.; Hong, K.W.; Jung, D.H. Dyslipidaemia—Genotype Interactions with Nutrient Intake and Cerebro-Cardiovascular Disease. *Biomedicines* **2022**, *10*, doi:10.3390/biomedicines10071615.
11. Sinnott-Armstrong, N.; Tanigawa, Y.; Amar, D.; Mars, N.; Benner, C.; Aguirre, M.; Venkataraman, G.R.; Wainberg, M.; Ollila, H.M.; Kiiskinen, T.; et al. Genetics of 35 blood and urine biomarkers in the UK Biobank. *Nat. Genet.* **2021**, *53*, 185–194, doi:10.1038/s41588-020-00757-z.
12. Astle, W.J.; Elding, H.; Jiang, T.; Allen, D.; Ruklisa, D.; Mann, A.L.; Mead, D.; Bouman, H.; Riveros-Mckay, F.; Kostadima, M.A.; et al. The Allelic Landscape of Human Blood Cell Trait Variation and Links to Common Complex Disease. *Cell* **2016**, *167*, 1415–1429.e19, doi:10.1016/j.cell.2016.10.042.
13. Chen, M.H.; Raffield, L.M.; Mousas, A.; Sakaue, S.; Huffman, J.E.; Moscati, A.; Trivedi, B.; Jiang, T.; Akbari, P.; Vuckovic, D.; et al. Trans-ethnic and Ancestry-Specific Blood-Cell Genetics in 746,667 Individuals from 5 Global Populations. *Cell* **2020**, *182*, 1198–1213.e14, doi:10.1016/j.cell.2020.06.045.
14. Graham, S.E.; Clarke, S.L.; Wu, K.H.H.; Kanoni, S.; Zajac, G.J.M.; Ramdas, S.; Surakka, I.; Ntalla, I.; Vedantam, S.; Winkler, T.W.; et al. The power of genetic diversity in genome-wide association studies of lipids. *Nature* **2021**, *600*, 675–679, doi:10.1038/S41586-021-04064-3.
15. Morris, A.P.; Le, T.H.; Wu, H.; Akbarov, A.; van der Most, P.J.; Hemani, G.; Smith, G.D.; Mahajan, A.; Gaulton, K.J.; Nadkarni, G.N.; et al. Trans-ethnic kidney function association study reveals putative causal genes and effects on kidney-specific disease aetiologies. *Nat. Commun.* **2019**, *10*, doi:10.1038/s41467-018-07867-7.

- 
16. Yin, X.; Chan, L.S.; Bose, D.; Jackson, A.U.; VandeHaar, P.; Locke, A.E.; Fuchsberger, C.; Stringham, H.M.; Welch, R.; Yu, K.; et al. Genome-wide association studies of metabolites in Finnish men identify disease-relevant loci. *Nat. Commun.* **2022**, *13*, 19, doi:10.1038/s41467-022-29143-5.
  17. Hysi, P.G.; Mangino, M.; Christofidou, P.; Falchi, M.; Karoly, E.D.; Mohny, R.P.; Valdes, A.M.; Spector, T.D.; Menni, C. Metabolome Genome-Wide Association Study Identifies 74 Novel Genomic Regions Influencing Plasma Metabolites Levels. *Metabolites* **2022**, *12*, doi:10.3390/metabo12010061.
  18. Shin, S.Y.; Fauman, E.B.; Petersen, A.K.; Krumsiek, J.; Santos, R.; Huang, J.; Arnold, M.; Erte, I.; Forgetta, V.; Yang, T.P.; et al. An atlas of genetic influences on human blood metabolites. *Nat. Genet.* **2014**, *46*, 543–550, doi:10.1038/ng.2982.
  19. Sakaue, S.; Kanai, M.; Tanigawa, Y.; Karjalainen, J.; Kurki, M.; Koshiba, S.; Narita, A.; Konuma, T.; Yamamoto, K.; Akiyama, M.; et al. A cross-population atlas of genetic associations for 220 human phenotypes. *Nat. Genet.* **2021**, *53*, 1415–1424, doi:10.1038/S41588-021-00931-X.
  20. Feofanova, E. V.; Chen, H.; Dai, Y.; Jia, P.; Grove, M.L.; Morrison, A.C.; Qi, Q.; Daviglus, M.; Cai, J.; North, K.E.; et al. A Genome-wide Association Study Discovers 46 Loci of the Human Metabolome in the Hispanic Community Health Study/Study of Latinos. *Am. J. Hum. Genet.* **2020**, *107*, 849–863, doi:10.1016/j.ajhg.2020.09.003.
  21. Yu, B.; Zheng, Y.; Alexander, D.; Morrison, A.C.; Coresh, J.; Boerwinkle, E. Genetic Determinants Influencing Human Serum Metabolome among African Americans. *PLoS Genet.* **2014**, *10*, doi:10.1371/journal.pgen.1004212.
  22. Wang, Z.; Zhu, Q.; Liu, Y.; Chen, S.; Zhang, Y.; Ma, Q.; Chen, X.; Liu, C.; Lei, H.; Chen, H.; et al. Genome-wide association study of metabolites in patients with coronary artery disease identified novel metabolite quantitative trait loci. *Clin. Transl. Med.* **2021**, *11*, doi:10.1002/CTM2.290.
  23. Liu, H.; Doke, T.; Guo, D.; Sheng, X.; Ma, Z.; Park, J.; Vy, H.M.T.; Nadkarni, G.N.; Abedini, A.; Miao, Z.; et al. Epigenomic and transcriptomic analyses define core cell types, genes and targetable mechanisms for kidney disease. *Nat. Genet.* **2022**, *54*, 950–962, doi:10.1038/S41588-022-01097-W.
  24. Schlosser, P.; Li, Y.; Sekula, P.; Raffler, J.; Grundner-Culemann, F.; Pietzner, M.; Cheng, Y.; Wuttke, M.; Steinbrenner, I.; Schultheiss, U.T.; et al. Genetic studies of urinary metabolites illuminate mechanisms of detoxification and excretion in humans. *Nat. Genet.* **2020**, *52*, 167–176, doi:10.1038/s41588-019-0567-8.
  25. Liu, M.; Jiang, Y.; Wedow, R.; Li, Y.; Brazel, D.M.; Chen, F.; Datta, G.; Davila-Velderrain, J.; McGuire, D.; Tian, C.; et al. Association studies of up to 1.2 million individuals yield new insights into the genetic etiology of tobacco and alcohol use. *Nat. Genet.* **2019**, *51*, 237–244, doi:10.1038/s41588-018-0307-5.
  26. Karlsson Linnér, R.; Biroli, P.; Kong, E.; Meddens, S.F.W.; Wedow, R.; Fontana, M.A.; Lebreton, M.; Tino, S.P.; Abdellaoui, A.; Hammerschlag, A.R.; et al. Genome-wide association analyses of risk tolerance and risky behaviors in over 1 million individuals identify hundreds of loci and shared genetic influences. *Nat. Genet.* **2019**, *51*, 245–257, doi:10.1038/s41588-018-0309-3.
  27. Emilsson, V.; Ilkov, M.; Lamb, J.R.; Finkel, N.; Gudmundsson, E.F.; Pitts, R.; Hoover, H.; Gudmundsdottir, V.; Horman, S.R.; Aspelund, T.; et al. Co-regulatory networks of human serum proteins link genetics to disease. *Science* **2018**, *361*, doi:10.1126/SCIENCE.AAQ1327.
  28. Thareja, G.; Belkadi, A.; Arnold, M.; Albagha, O.M.E.; Graumann, J.; Schmidt, F.; Grallert, H.; Peters, A.; Gieger, C.; Consortium, T.Q.G.P.R.; et al. Differences and commonalities in the genetic architecture of protein quantitative trait loci in European and Arab populations. *Hum. Mol. Genet.* **2022**, *00*, 1–10, doi:10.1093/hmg/ddac243.
  29. Hernandez Cordero, A.I.; Gonzales, N.M.; Parker, C.C.; Sokolof, G.; Vandenberg, D.J.; Cheng, R.; Abney, M.; Sko, A.; Douglas, A.; Palmer, A.A.; et al. Genome-wide Associations Reveal Human-Mouse Genetic Convergence and Modifiers of Myogenesis, CPNE1 and STC2. *Am. J. Hum. Genet.* **2019**, *105*, 1222–1236, doi:10.1016/j.ajhg.2019.10.014.
  30. Richardson, T.G.; Leyden, G.M.; Wang, Q.; Bell, J.A.; Elsworth, B.; Smith, G.D.; Holmes, M. V. Characterising metabolomic signatures of lipid-modifying therapies through drug target mendelian randomisation. *PLoS Biol.* **2022**, *20*,

---

doi:10.1371/journal.pbio.3001547.

31. Christakoudi, S.; Evangelou, E.; Riboli, E.; Tsilidis, K.K. GWAS of allometric body-shape indices in UK Biobank identifies loci suggesting associations with morphogenesis, organogenesis, adrenal cell renewal and cancer. *Sci. Rep.* **2021**, *11*, 10688, doi:10.1038/s41598-021-89176-6.
32. Ritchie, M.D.; Verma, S.S.; Hall, M.A.; Goodloe, R.J.; Berg, R.L.; Carrell, D.S.; Carlson, C.S.; Chen, L.; Crosslin, D.R.; Denny, J.C.; et al. Electronic medical records and genomics (eMERGE) network exploration in cataract: Several new potential susceptibility loci. *Mol. Vis.* **2014**, *20*, 1281–1295.
33. Timmins, I.R.; Zaccardi, F.; Nelson, C.P.; Franks, P.; Yates, T.; Dudbridge, F. Genome-wide association study of self-reported walking pace suggests beneficial effects of brisk walking on health and survival. *Commun. Biol.* **2020**, *3*, doi:10.1038/s42003-020-01357-7.
34. Evangelou, E.; Gao, H.; Chu, C.; Ntritsos, G.; Blakeley, P.; Butts, A.R.; Pazoki, R.; Suzuki, H.; Koskeridis, F.; Yiorkas, A.M.; et al. New alcohol-related genes suggest shared genetic mechanisms with neuropsychiatric disorders. *Nat. Hum. Behav.* **2019**, *3*, 950–961, doi:10.1038/s41562-019-0653-z.
35. Zhou, H.; Sealock, J.M.; Sanchez-Roige, S.; Clarke, T.K.; Levey, D.F.; Cheng, Z.; Li, B.; Polimanti, R.; Kember, R.L.; Smith, R.V.; et al. Genome-wide meta-analysis of problematic alcohol use in 435,563 individuals yields insights into biology and relationships with other traits. *Nat. Neurosci.* **2020**, *23*, 809–818, doi:10.1038/s41593-020-0643-5.
36. Saunders, G.R.B.; Wang, X.; Chen, F.; Jang, S.K.; Liu, M.; Wang, C.; Gao, S.; Jiang, Y.; Khunsriraksakul, C.; Otto, J.M.; et al. Genetic diversity fuels gene discovery for tobacco and alcohol use. *Nature* **2022**, doi:10.1038/s41586-022-05477-4.
37. Chouraki, V.; De Bruijn, R.F.A.G.; Chapuis, J.; Bis, J.C.; Reitz, C.; Schraen, S.; Ibrahim-Verbaas, C.A.; Grenier-Boley, B.; Delay, C.; Rogers, R.; et al. A genome-wide association meta-analysis of plasma A $\beta$  peptide concentrations in the elderly. *Mol. Psychiatry* **2014**, *19*, 1326–1335, doi:10.1038/mp.2013.185.
38. Medina-Gomez, C.; Kemp, J.P.; Trajanoska, K.; Luan, J.; Chesi, A.; Ahluwalia, T.S.; Mook-Kanamori, D.O.; Ham, A.; Hartwig, F.P.; Evans, D.S.; et al. Life-Course Genome-wide Association Study Meta-analysis of Total Body BMD and Assessment of Age-Specific Effects. *Am. J. Hum. Genet.* **2018**, *102*, 88–102, doi:10.1016/j.ajhg.2017.12.005.
39. Richardson, T.G.; Sanderson, E.; Palmerid, T.M.; Korpelaid, M.A.; Ference, B.A.; Smith, G.D.; Holmes, M. V. Evaluating the relationship between circulating lipoprotein lipids and apolipoproteins with risk of coronary heart disease: A multivariable Mendelian randomisation analysis. *PLoS Med.* **2020**, *17*, doi:10.1371/JOURNAL.PMED.1003062.
40. Tin, A.; Marten, J.; Halperin Kuhns, V.L.; Li, Y.; Wuttke, M.; Kirsten, H.; Sieber, K.B.; Qiu, C.; Gorski, M.; Yu, Z.; et al. Target genes, variants, tissues and transcriptional pathways influencing human serum urate levels. *Nat. Genet.* **2019**, *51*, 1459–1474, doi:10.1038/s41588-019-0504-x.
41. Borges, M.C.; Haycock, P.C.; Zheng, J.; Hemani, G.; Holmes, M. V.; Davey Smith, G.; Hingorani, A.D.; Lawlor, D.A. Role of circulating polyunsaturated fatty acids on cardiovascular diseases risk: analysis using Mendelian randomization and fatty acid genetic association data from over 114,000 UK Biobank participants. *BMC Med.* **2022**, *20*, doi:10.1186/s12916-022-02399-w.
42. Wyss, A.B.; Sofer, T.; Lee, M.K.; Terzikhan, N.; Nguyen, J.N.; Lahousse, L.; Latourelle, J.C.; Smith, A.V.; Bartz, T.M.; Feitosa, M.F.; et al. Multiethnic meta-analysis identifies ancestry-specific and cross-ancestry loci for pulmonary function. *Nat. Commun.* **2018**, *9*, doi:10.1038/s41467-018-05369-0.
43. Chai, J.F.; Raichur, S.; Khor, I.W.; Torta, F.; Chew, W.S.; Herr, D.R.; Ching, J.; Kovalik, J.P.; Khoo, C.M.; Wenk, M.R.; et al. Associations with metabolites in Chinese suggest new metabolic roles in Alzheimer’s and Parkinson’s diseases. *Hum. Mol. Genet.* **2020**, *29*, 189–201, doi:10.1093/HMG/DDZ246.
44. Rhee, E.P.; Surapaneni, A.; Zheng, Z.; Zhou, L.; Dutta, D.; Arking, D.E.; Zhang, J.; Duong, T.V.; Chatterjee, N.; Luo, S.; et al. Trans-ethnic genome-wide association study of blood metabolites in the Chronic Renal Insufficiency Cohort (CRIC) study. *Kidney Int.* **2022**, *101*, 814–823, doi:10.1016/j.kint.2022.01.014.

- 
45. Jia, Q.; Han, Y.; Huang, P.; Woodward, N.C.; Gukasyan, J.; Kettunen, J.; Ala-Korpela, M.; Anufrieva, O.; Wang, Q.; Perola, M.; et al. Genetic Determinants of Circulating Glycine Levels and Risk of Coronary Artery Disease. *J. Am. Heart Assoc.* **2019**, *8*, doi:10.1161/JAHA.119.011922.
  46. Lotta, L.A.; Pietzner, M.; Stewart, I.D.; Wittemans, L.B.L.; Li, C.; Bonelli, R.; Raffler, J.; Biggs, E.K.; Oliver-Williams, C.; Auyeung, V.P.W.; et al. Cross-platform genetic discovery of small molecule products of metabolism and application to clinical outcomes. *Nat. Genet.* **2021**, *53*, 54, doi:10.1038/S41588-020-00751-5.
  47. Wittemans, L.B.L.; Lotta, L.A.; Oliver-Williams, C.; Stewart, I.D.; Surendran, P.; Karthikeyan, S.; Day, F.R.; Koulman, A.; Imamura, F.; Zeng, L.; et al. Assessing the causal association of glycine with risk of cardio-metabolic diseases. *Nat. Commun.* **2019**, *10*, doi:10.1038/S41467-019-08936-1.
  48. Li, Y.; Sekula, P.; Wuttke, M.; Wahrheit, J.; Hausknecht, B.; Schultheiss, U.T.; Gronwald, W.; Schlosser, P.; Tucci, S.; Ekici, A.B.; et al. Genome-Wide Association Studies of Metabolites in Patients with CKD Identify Multiple Loci and Illuminate Tubular Transport Mechanisms. *J. Am. Soc. Nephrol.* **2018**, *29*, 1513–1524, doi:10.1681/ASN.2017101099.
  49. Illig, T.; Gieger, C.; Zhai, G.; Römisch-Margl, W.; Wang-Sattler, R.; Prehn, C.; Altmaier, E.; Kastenmüller, G.; Kato, B.S.; Mewes, H.W.; et al. A genome-wide perspective of genetic variation in human metabolism. *Nat. Genet.* **2010**, *42*, 137–141, doi:10.1038/NG.507.
  50. Kachuri, L.; Jeon, S.; DeWan, A.T.; Metayer, C.; Ma, X.; Witte, J.S.; Chiang, C.W.K.; Wiemels, J.L.; de Smith, A.J. Genetic determinants of blood-cell traits influence susceptibility to childhood acute lymphoblastic leukemia. *Am. J. Hum. Genet.* **2021**, *108*, 1823–1835, doi:10.1016/J.AJHG.2021.08.004.
  51. Gouveia, M.H.; Bentley, A.R.; Leonard, H.; Meeks, K.A.C.; Ekoru, K.; Chen, G.; Nalls, M.A.; Simonsick, E.M.; Tarazona-Santos, E.; Lima-Costa, M.F.; et al. Trans-ethnic meta-analysis identifies new loci associated with longitudinal blood pressure traits. *Sci. Rep.* **2021**, *11*, doi:10.1038/S41598-021-83450-3.
  52. Hu, Y.; Bien, S.A.; Nishimura, K.K.; Haessler, J.; Hodonsky, C.J.; Baldassari, A.R.; Highland, H.M.; Wang, Z.; Preuss, M.; Sitlani, C.M.; et al. Multi-ethnic genome-wide association analyses of white blood cell and platelet traits in the Population Architecture using Genomics and Epidemiology (PAGE) study. *BMC Genomics* **2021**, *22*, doi:10.1186/S12864-021-07745-5.
  53. Qayyum, R.; Snively, B.M.; Ziv, E.; Nalls, M.A.; Liu, Y.; Tang, W.; Yanek, L.R.; Lange, L.; Evans, M.K.; Ganesh, S.; et al. A meta-analysis and genome-wide association study of platelet count and mean platelet volume in African Americans. *PLoS Genet.* **2012**, *8*, doi:10.1371/journal.pgen.1002491.
  54. Igarashi, M.; Nogawa, S.; Kawafune, K.; Hachiya, T.; Takahashi, S.; Jia, H.; Saito, K.; Kato, H. Identification of the 12q24 locus associated with fish intake frequency by genome-wide meta-analysis in Japanese populations. *Genes Nutr.* **2019**, *14*, doi:10.1186/S12263-019-0646-6.
  55. Cho, S.K.; Kim, B.; Myung, W.; Chang, Y.; Ryu, S.; Kim, H.N.; Kim, H.L.; Kuo, P.H.; Winkler, C.A.; Won, H.H. Polygenic analysis of the effect of common and low-frequency genetic variants on serum uric acid levels in Korean individuals. *Sci. Rep.* **2020**, *10*, doi:10.1038/S41598-020-66064-Z.
  56. Yasukochi, Y.; Sakuma, J.; Takeuchi, I.; Kato, K.; Oguri, M.; Fujimaki, T.; Horibe, H.; Yamada, Y. Identification of CDC42BPG as a novel susceptibility locus for hyperuricemia in a Japanese population. *Mol. Genet. Genomics* **2018**, *293*, 371–379, doi:10.1007/S00438-017-1394-1.
  57. Yang, W.; Li, L.; Feng, X.; Cheng, H.; Ge, X.; Bao, Y.; Huang, L.; Wang, F.; Liu, C.; Chen, X.; et al. Genome-wide association and Mendelian randomization study of blood copper levels and 213 deep phenotypes in humans. *Commun. Biol.* **2022**, *5*, doi:10.1038/S42003-022-03351-7.
  58. Gudjonsson, A.; Gudmundsdottir, V.; Axelsson, G.T.; Gudmundsson, E.F.; Jonsson, B.G.; Launer, L.J.; Lamb, J.R.; Jennings, L.L.; Aspelund, T.; Emilsson, V.; et al. A genome-wide association study of serum proteins reveals shared loci with common diseases. *Nat. Commun.* **2022**, *13*, doi:10.1038/S41467-021-27850-Z.

- 
59. Liu, X.; Xu, H.; Xu, H.; Geng, Q.; Mak, W.H.; Ling, F.; Su, Z.; Yang, F.; Zhang, T.; Chen, J.; et al. New genetic variants associated with major adverse cardiovascular events in patients with acute coronary syndromes and treated with clopidogrel and aspirin. *Pharmacogenomics J.* **2021**, *21*, 664–672, doi:10.1038/S41397-021-00245-5.
  60. Watanabe, K.; Jansen, P.R.; Savage, J.E.; Nandakumar, P.; Wang, X.; Agee, M.; Aslibekyan, S.; Auton, A.; Bell, R.K.; Bryc, K.; et al. Genome-wide meta-analysis of insomnia prioritizes genes associated with metabolic and psychiatric pathways. *Nat. Genet.* **2022**, *54*, 1125–1132, doi:10.1038/S41588-022-01124-W.
